# Supplementary material for: Molecular and clinical features of the TP53 signature gene expression profile in early-stage breast cancer
Source: PubMed Central journal article supplement (PMC5865663; doi:10.18632/oncotarget.24447), 2018-02-08
Supplement: oncotarget-09-14193-s001.pdf [file oncotarget-09-14193-s001.pdf]

# Molecular and clinical features of the *TP53* signature gene expression profile in early-stage breast cancer

## SUPPLEMENTARY MATERIALS

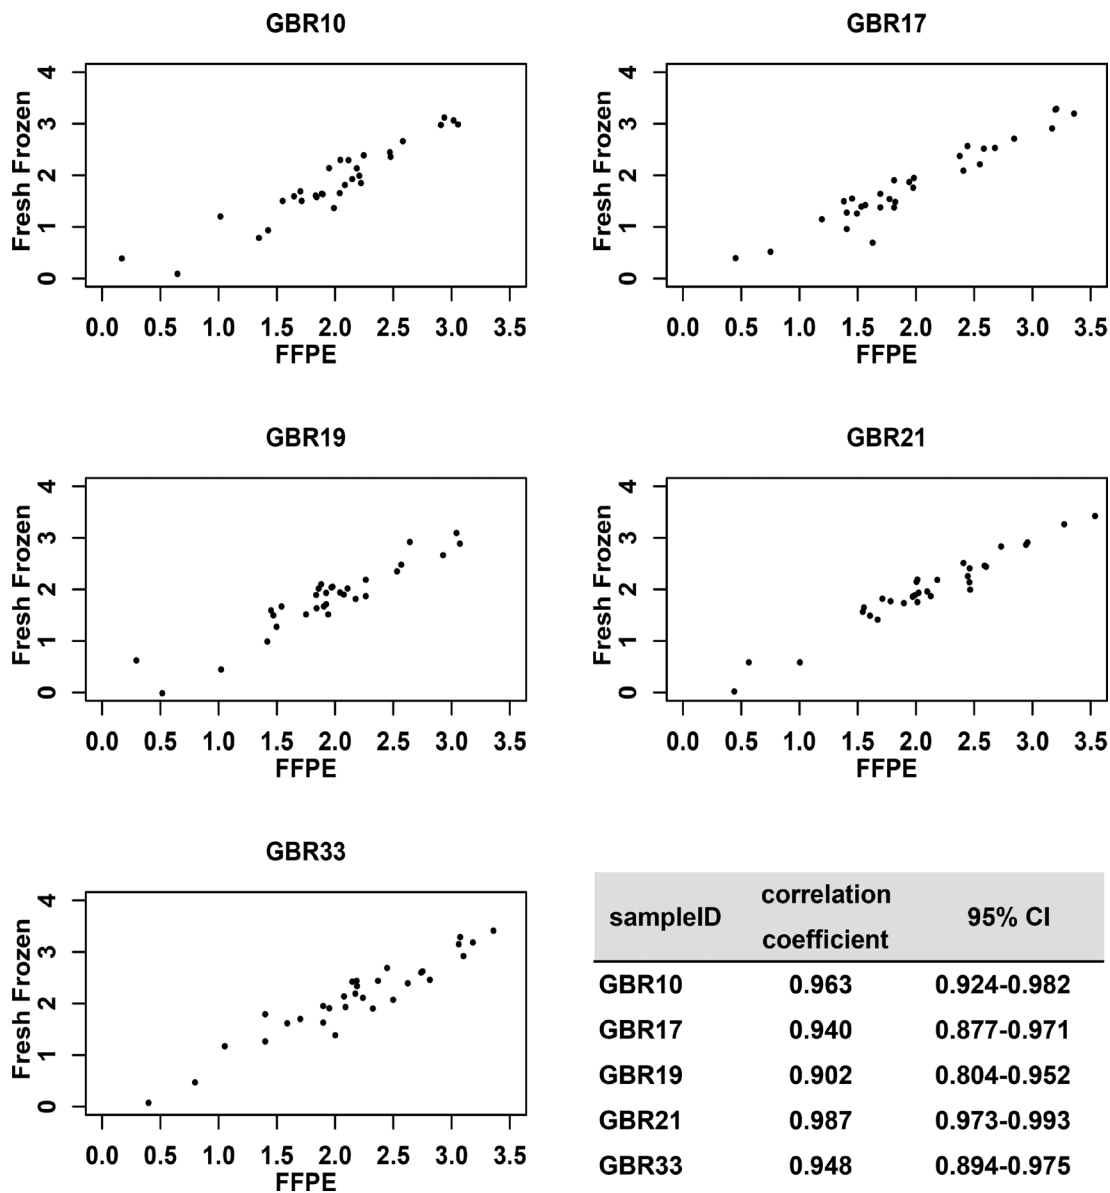

**Supplementary Figure 1: Correlation of count data by nCounter between FF and FFPE samples.** X-axis represents the count data of 31 genes in the FFPE samples, and Y-axis represents the count data of the same 31 genes in the FF samples. Panel (A) shows the expression data of the “GBR10” sample, panel (B) shows “GBR17” sample, panel (C) shows “GBR19” sample, panel (D) shows “GBR21” sample, and panel (E) shows “GBR33” sample.

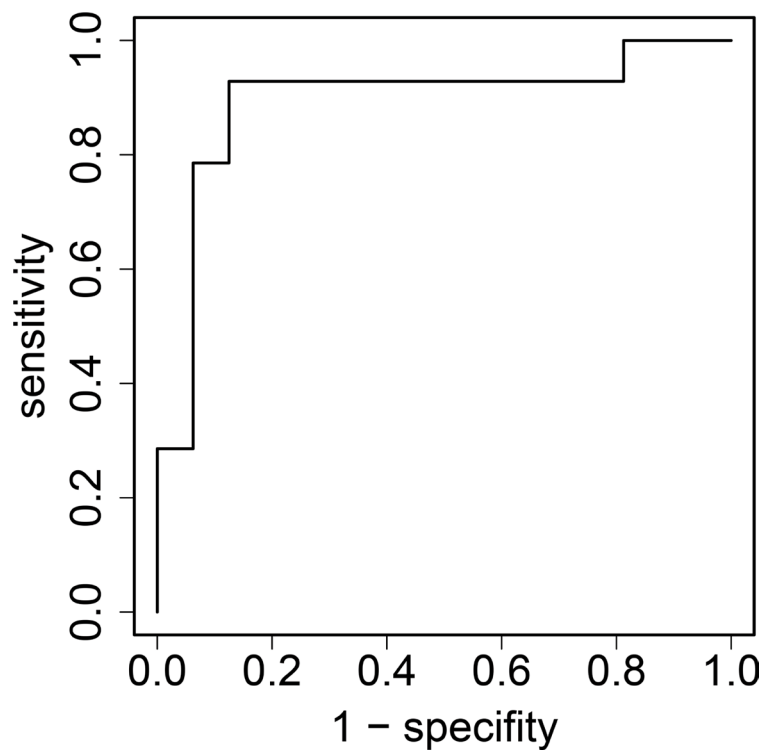

**Supplementary Figure 2: ROC curve for determining the cutoff value of *TP53* signature status.** ROC curve was calculated using *TP53* signature risk score and *TP53* structural status in the learning cohort, and the area under the curve was 0.90.

**Supplementary Table 1: *TP53* status diagnosed by *TP53* signature score, microarray, and Sanger sequence in the FFPE learning cohort**

| Sample | <i>TP53</i> signature score | <i>TP53</i> status by <i>TP53</i> signature | <i>TP53</i> status by Sanger sequence |
|--------|-----------------------------|---------------------------------------------|---------------------------------------|
| BR009  | 3.372916167                 | MT                                          | MT                                    |
| BR055  | 3.343642865                 | MT                                          | MT                                    |
| BR041  | 1.96016837                  | MT                                          | MT                                    |
| BR062  | 1.892222328                 | MT                                          | MT                                    |
| BR048  | 1.829768199                 | MT                                          | WT                                    |
| BR011  | 1.79347266                  | MT                                          | MT                                    |
| BR021  | 1.783801392                 | MT                                          | MT                                    |
| BR053  | 1.743656135                 | MT                                          | MT                                    |
| BR022  | 1.520755661                 | MT                                          | MT                                    |
| BR005  | 1.350768328                 | MT                                          | MT                                    |
| BR001  | 1.28669542                  | MT                                          | MT                                    |
| BR020  | 1.126557719                 | MT                                          | MT                                    |
| BR017  | 1.021076309                 | MT                                          | WT                                    |
| BR026  | 0.809491027                 | MT                                          | MT                                    |
| BR040  | 0.781821629                 | MT                                          | MT                                    |
| BR043  | 0.772262732                 | WT                                          | WT                                    |
| BR013  | 0.66404536                  | WT                                          | WT                                    |
| BR047  | 0.632089364                 | WT                                          | WT                                    |
| BR058  | 0.592946149                 | WT                                          | WT                                    |
| BR036  | 0.564402919                 | WT                                          | WT                                    |
| BR027  | 0.445487579                 | WT                                          | WT                                    |
| BR019  | 0.44296845                  | WT                                          | WT                                    |
| BR038  | 0.440757225                 | WT                                          | WT                                    |
| BR045  | 0.414633807                 | WT                                          | WT                                    |
| BR007  | 0.410896193                 | WT                                          | WT                                    |
| BR059  | 0.397292933                 | WT                                          | WT                                    |
| BR050  | 0.375231335                 | WT                                          | MT                                    |
| BR024  | 0.352493534                 | WT                                          | WT                                    |
| BR052  | 0.328128764                 | WT                                          | WT                                    |

**Supplementary Table 2: Somatic mutation Genes which are high frequency in *TP53* signature MT (TCGA data).** See Supplementary\_Table\_2

**Supplementary Table 3: Gene enrichment analysis of mutation genes which are high frequency in *TP53* signature MT (TCGA data SVM).** See Supplementary\_Table\_3

**Supplementary Table 4: Somatic mutation Genes which are high frequency in TP53 structure WT TP53 signature MT (TCGA data SVM)**

| <b>TP53 status</b> | <b>structureWT signature_MT</b> | <b>structureWT signature_WT</b> |
|--------------------|---------------------------------|---------------------------------|
| BRCA2              | 10                              | 6                               |
| HMCN1              | 7                               | 4                               |
| USH2A              | 7                               | 4                               |
| RELN               | 7                               | 1                               |
| MDN1               | 6                               | 4                               |
| MUC17              | 6                               | 4                               |
| DST                | 6                               | 3                               |
| TACC2              | 6                               | 2                               |
| HUWE1              | 6                               | 1                               |
| PKHD1L1            | 6                               | 1                               |
| UBR4               | 6                               | 1                               |
| GON4L              | 6                               | 0                               |
| APOB               | 5                               | 3                               |
| PIK3R1             | 5                               | 3                               |
| ATRX               | 5                               | 2                               |
| CADPS              | 5                               | 2                               |
| MYH7               | 5                               | 2                               |
| SRCAP              | 5                               | 2                               |
| DDR2               | 5                               | 1                               |
| MXRA5              | 5                               | 1                               |
| XIRP2              | 5                               | 1                               |
| CUL4B              | 4                               | 1                               |
| DISP2              | 4                               | 1                               |
| ERCC6              | 4                               | 1                               |
| IPO8               | 4                               | 1                               |
| MET                | 4                               | 1                               |
| NID1               | 4                               | 1                               |
| RNF213             | 4                               | 1                               |
| RP11-404K5.2       | 4                               | 1                               |
| SCN5A              | 4                               | 1                               |
| TLR4               | 4                               | 1                               |
| TNXB               | 4                               | 1                               |
| TPR                | 4                               | 1                               |
| TRIM6              | 4                               | 1                               |
| FAM169A            | 4                               | 0                               |
| FYCO1              | 4                               | 0                               |
| OR12D3             | 4                               | 0                               |
| PCDH18             | 4                               | 0                               |
| RB1                | 4                               | 0                               |
| SCN10A             | 4                               | 0                               |
| TMEM131            | 4                               | 0                               |
| UCK2               | 4                               | 0                               |
| VCAN               | 4                               | 0                               |
| ZNF266             | 4                               | 0                               |

**Supplementary Table 5: Gene enrichment analysis of genes which are high frequency in TP53 structure WT TP53 signature MT.** See Supplementary\_Table\_5

**Supplementary Table 6: PAM50 vs TP53 signature**

| RNA-seq data         |           |           |               |            |             |
|----------------------|-----------|-----------|---------------|------------|-------------|
|                      | Luminal A | Luminal B | HER2-enriched | Basal-like | Normal-like |
| TP53 signature MT    | 0         | 13        | 11            | 17         | 2           |
| TP53 signature WT    | 33        | 17        | 4             | 5          | 18          |
| TCGA data SVM        |           |           |               |            |             |
|                      | Luminal A | Luminal B | HER2-enriched | Basal-like | Normal-like |
| TP53 signature MT    | 15        | 60        | 35            | 72         | 3           |
| TP53 signature WT    | 180       | 41        | 7             | 3          | 4           |
| TCGA data clustering |           |           |               |            |             |
|                      | Luminal A | Luminal B | HER2-enriched | Basal-like | Normal-like |
| TP53 signature MT    | 1         | 44        | 21            | 94         | 1           |
| TP53 signature WT    | 229       | 81        | 37            | 4          | 7           |
